# Supplementary material for: Species distribution modelling of Bryde’s whales, humpback whales, southern right whales, and sperm whales in the southern African region to inform their conservation in expanding economies
Source: PeerJ journal article supplement (doi:10.7717/peerj.9997), 2020-09-22

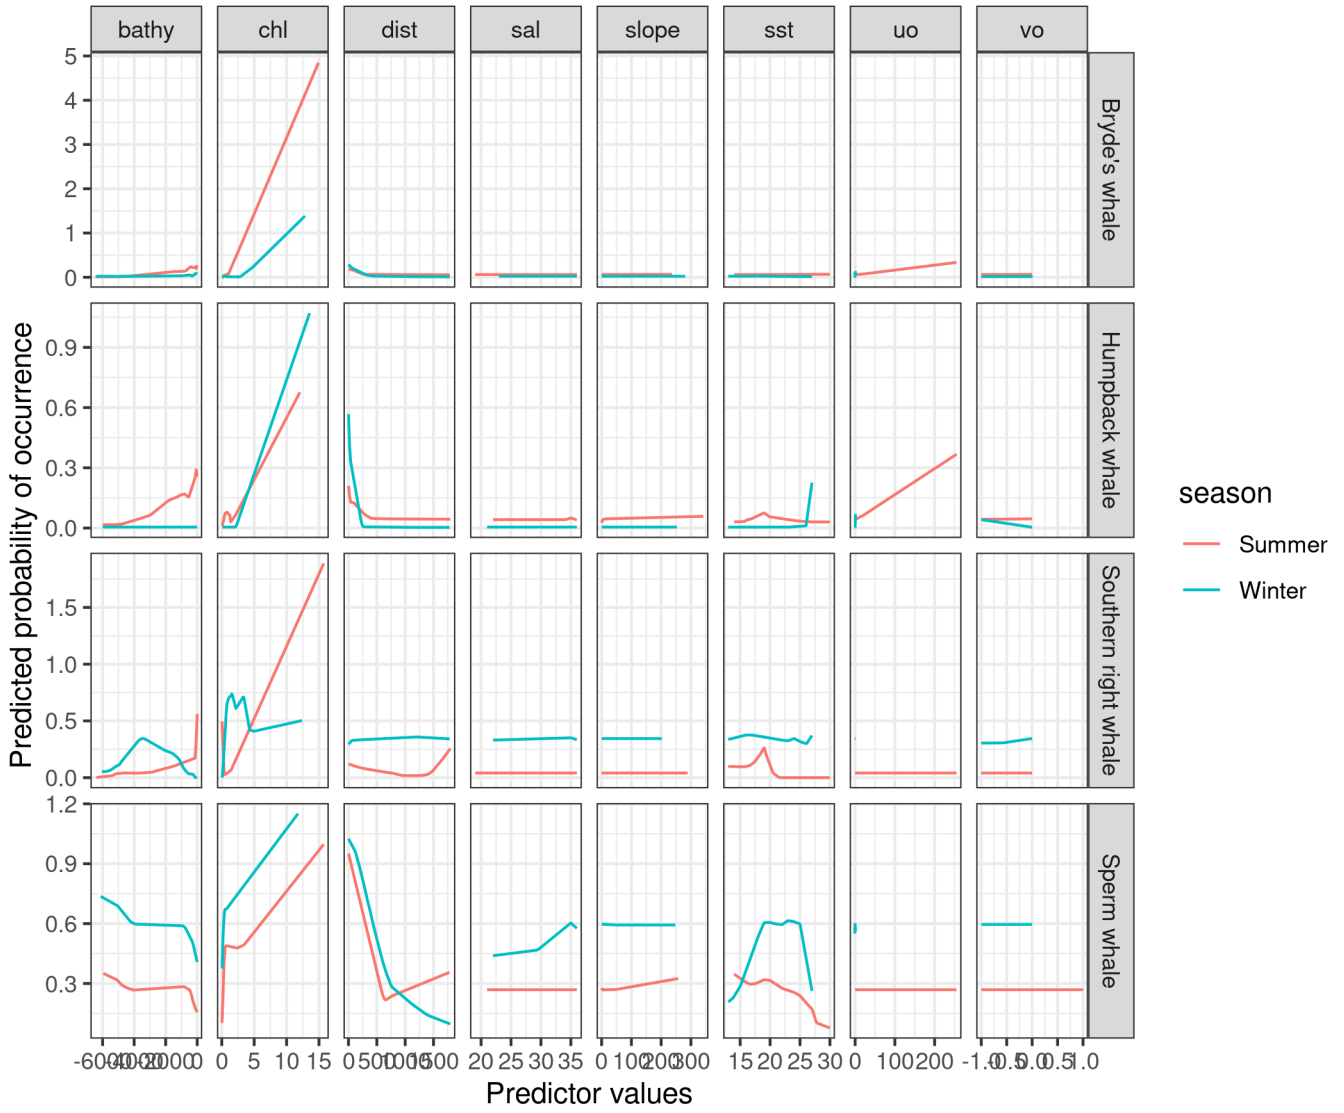

Supplement: figure_3e_MARS_thin.tif.pdf [file figure_3e_MARS_thin.tif.pdf]
